# Supplementary material
Source: publisher figshare collection journal article supplement (https://acs.figshare.com/ndownloader/files/34698328)
Supplement: Supplementary file 1 [file 34698328]

## Supporting Information

### Unraveling Amphiphilic Poly(N-vinylcaprolactam)/Water Interface by Nuclear Magnetic Resonance Relaxometry: Control of Clathrate Hydrate Formation Kinetics

Dong Wang <sup>a</sup>, Dongfang Li <sup>a</sup>, Malcolm A. Kelland <sup>b</sup>,

Haokun Cai <sup>c</sup>, Jie Wang <sup>a</sup>, Ying Xu <sup>a</sup>, Ping Lu <sup>a</sup>, and Jian Dong <sup>a\*</sup>

<sup>a</sup> College of Chemistry and Chemical Engineering, Shaoxing University, Shaoxing,

Zhejiang Province 312000, China

<sup>b</sup> Department of Chemistry, Bioscience and Environmental Engineering, Faculty of

Science and Technology, University of Stavanger, N-4036 Stavanger, Norway

<sup>c</sup> Ningbo Academy of Product and Food Quality Inspection (Ningbo Fiber Inspection

Institute), Ningbo, Zhejiang Province 315048, China

\* Corresponding Author: Jian Dong, College of Chemistry and Chemical

Engineering, Shaoxing University, Shaoxing, Zhejiang Province 312000, China;

orcid.org/0000-0002-2887-8101;

Phone: +86-575-88342511; Email: jiandong@usx.edu.cn

## Contents of Supporting Information

**Figure S1.** Isothermal hold time measurement of THF-water solutions by rotational rheometer in the presence of PVCap with different MWs.

**Figure S2.**  $T_2$  distribution curves of  $d_8$ -THF aqueous solution (THF/water 1/3 v/v) without the polymer during cooling.

**Figure S3.** Arrhenius plot of  $T_2$  relaxation peak position in logarithmic values of free water species and bound water species in  $d_8$ -THF-water with PVCap versus reciprocal temperature during cooling from 303 K to 263 K.

**Figure S4.** Time-dependent changes of bound water in their  $T_2$  relaxation distributions in the solution with PVCap  $M_n = 49.4$  kD during isothermal crystallization at  $-15^\circ\text{C}$ .

**Figure S5.** Isothermal changes of the bound water peak areas in the presence of PVCap with time at 258 K.

**Figure S6.** Typical calorimetric traces of water mixed with different amounts of PVCap polymers recorded from  $-30$  to  $30^\circ\text{C}$ .

**Determination method of free and bound water dynamics based on BPP theory.**

**Table S1.** Activation energies ( $E_A$ ) and correlation times ( $\tau_0$ ) of bound and free water in  $d_8$ -THF-water solutions with and without PVCap measured in the temperature range of 303 K to 263 K.

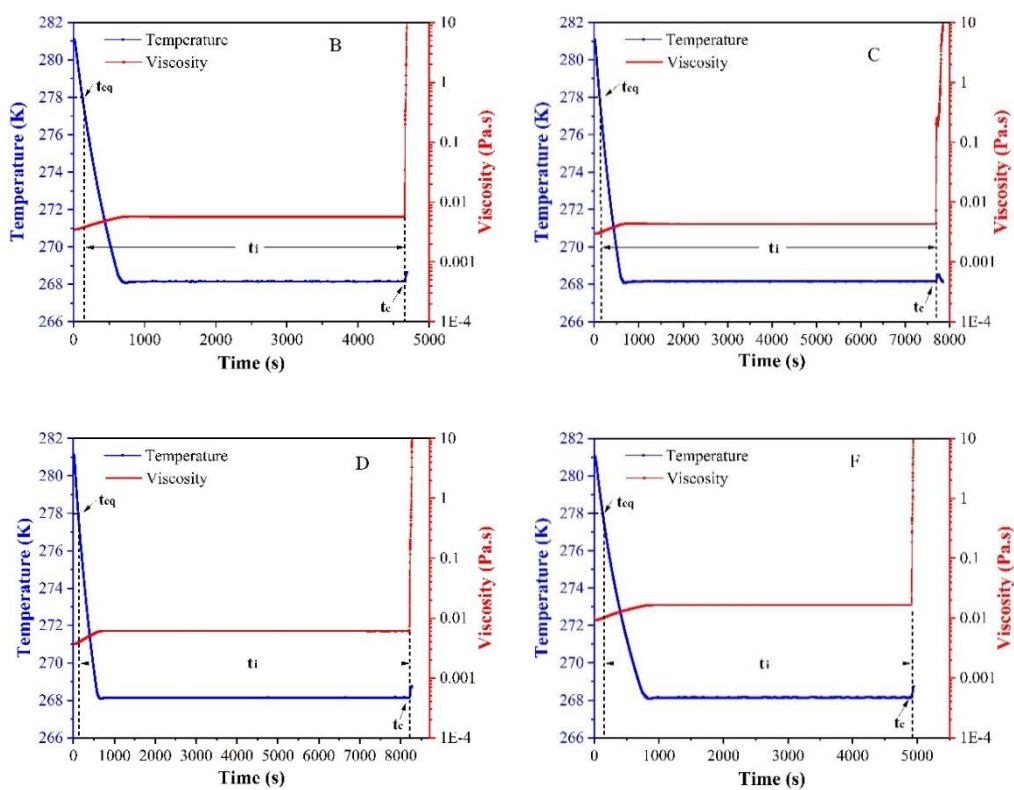

**Figure S1.** Isothermal hold time measurement of THF-water solutions by rotational rheometer in the presence of PVCap with different MWs. Sample B to F correspond to samples listed in Table 1, respectively. (B)  $M_n=13.5$  kD; (C)  $M_n=24.9$  kD; (D)  $M_n=40.5$  kD; (F)  $M_n=106$  kD.

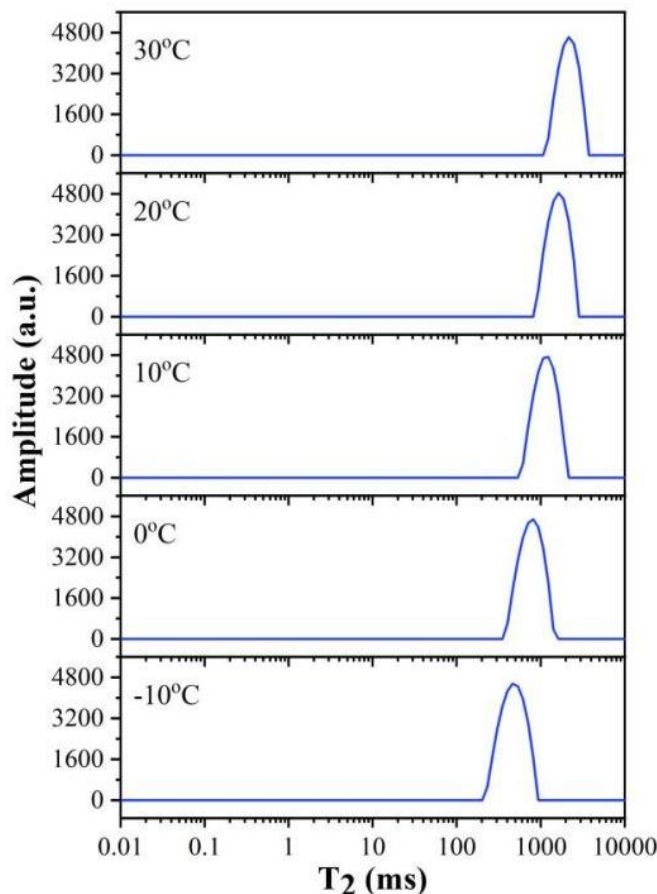

**Figure S2.**  $T_2$  distribution curves of  $d_8$ -THF aqueous solution (THF/water 1/3 v/v) without the polymer during cooling.

**Determination method of free and bound water dynamics based on BPP theory.** Dynamics of water motions can be extracted from the variable temperature data of  $T_2$  by using a classical Bloembergen Purcell and Pound (BPP) description for the intrinsic  $T_2$  relaxation rate (Bloembergen, et al. 1948; Solomon, 1955; McConville et al., 2002; McConville and Pope, 2001; Mallamace et al., 2016).<sup>57-61</sup> The BPP theory assumes rapid molecular motional averaging and describes the dependence of  $T_2$  on the correlation time ( $\tau_c$ ) for the motion of water in the sample:

$$\frac{1}{T_2} = \frac{c}{2} \left[ 3\tau_c + \frac{5\tau_c}{1 + \omega_0^2\tau_c^2} + \frac{2\tau_c}{1 + 4\omega_0^2\tau_c^2} \right] \quad (\text{Equation S1})$$

where correlation time  $\tau_c$  is the time needed for the deflection (rotation) of the molecules to be one radian ( $60^\circ$ ),  $\omega_0$  is the Larmor frequency,  $C$  is hydrogen dipole-dipole interaction constant and calculated to be  $5.33 \times 10^9 \text{ s}^{-2}$ . The interproton distance is  $1.58 \text{ \AA}$  for evaluation of  $C$  constant in Equation S1 (A. Yilmaz, H. Budak, F. S. Ulak, Determination of the effective correlation time modulating  $^1\text{H}$  NMR relaxation processes of bound water in protein solutions. *Magnetic Resonance Imaging* **2008**, *26*, 254-260). An Arrhenius activation law can then be used to describe thermal activation of the molecular motion:

$$\tau_c = \tau_0 e^{E_A/kT} \quad (\text{Equation S2})$$

where  $E_A$  is the activation energy of molecular rotation and translation,  $T$  is temperature,  $\tau_0$  is correlation time at infinite temperature,  $k$  is the Boltzmann constant.

The instrument works at  $\omega_0 = 11.92 \text{ MHz}$ , namely,  $1/\omega_0 = 8.39 \times 10^{-8} \text{ s} \gg \tau_c$ , which satisfies the condition  $\omega_0 \tau_c \ll 1$ . Thus, the above BPP Equation S1 is simplified into

$$\frac{1}{T_2} \approx \frac{10C\tau_c}{2} = 5C\tau_0 e^{E_A/kT} \quad (\text{Equation S3})$$

$\ln T_2$  is confirmed to have a linear relationship with  $1/T$  in the experiments described below. Therefore, the  $T_2$  relaxation process shows an Arrhenius dependence on temperature  $T$ , while  $\tau_0$  and  $E_A$  can be obtained from the intercept and slope by linear fitting  $\ln T_2$  versus reciprocal temperature  $1/T$ ,

$$-\ln(T_2) = \ln(5C\tau_0) + \frac{E_A}{kT} \quad (\text{Equation S4})$$

The temperature-variable  $T_2$  distributions of  $d_8$ -THF aqueous solution without the polymers are shown in Figure S2. Analytical results of the temperature-variable  $T_2$  peaks in the presence of the polymers in Fig.3 in the manuscript as well as those of

the  $d_8$ -THF aqueous solution without the polymer in Figure S2 using Equation S4 are shown in Figure S3. The obtained activation energies  $E_A$  and correlation times  $\tau_0$  are listed in Table S1 which show that the motion of the bound and free water are sensitive to the addition of polymers and the rotation of the bound water is 3-4 orders of magnitude slower than that of the free water.

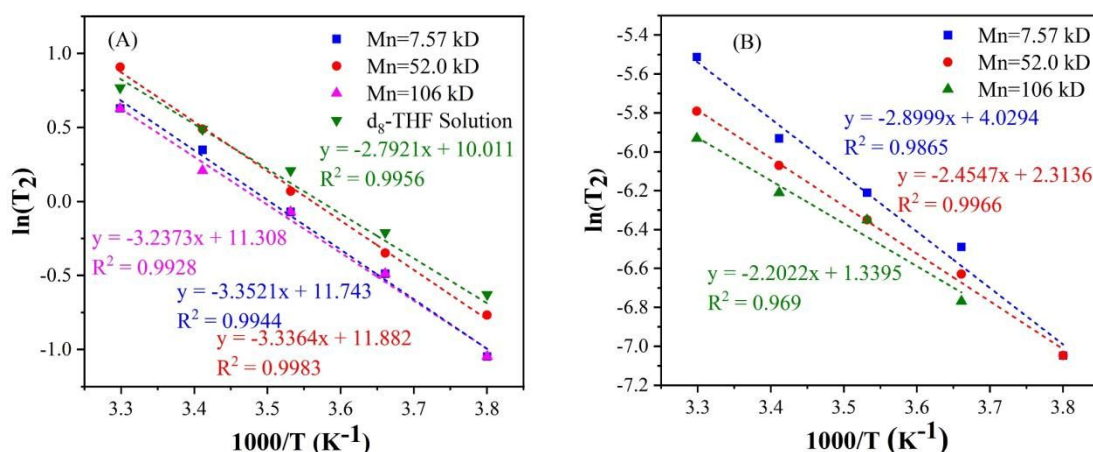

**Figure S3.** Arrhenius plot of  $T_2$  relaxation peak position in logarithmic values of free water species (panel A) and bound water species (panel B) in  $d_8$ -THF-water with PVCap versus reciprocal temperature during cooling from 303 K to 263 K (30°C to -10°C). The data without PVCap are also shown in the left panel.

**Table S1.** Activation energies ( $E_A$ ) and correlation times ( $\tau_0$ ) of bound and free water in  $d_8$ -THF-water solutions with and without PVCap measured in the temperature range of 303 K to 263 K.

| $d_8$ -THF Solution Type | $E_A$ (kJ mol <sup>-1</sup> )<br>Free Water | $E_A$ (kJ mol <sup>-1</sup> )<br>Bound Water | $\tau_0$ (s)<br>Free Water    | $\tau_0$ (s)<br>Bound Water    |
|--------------------------|---------------------------------------------|----------------------------------------------|-------------------------------|--------------------------------|
| $d_8$ -THF without PVCap | 23.21±0.89                                  | -                                            | (1.68±0.66)×10 <sup>-15</sup> | -                              |
| with PVCap $M_n=7.57$ kD | 27.87±1.20                                  | 24.11±1.63                                   | (2.98±1.60)×10 <sup>-16</sup> | (6.67±5.04) ×10 <sup>-13</sup> |
| with PVCap $M_n=52$ kD   | 27.74±0.67                                  | 20.41±0.69                                   | (2.59±0.75)×10 <sup>-16</sup> | (3.71±1.11) ×10 <sup>-12</sup> |
| with PVCap $M_n=106$ kD  | 26.91±1.32                                  | 18.31±2.32                                   | (4.61±2.74)×10 <sup>-16</sup> | (9.83±6.12)×10 <sup>-12</sup>  |

Equation S1 describes only the random modulation of interproton dipolar interactions by water molecules rotation but water translation can affect  $T_2$  relaxation. Chemical exchange between free and bound water may affect diffusion ability. The

protons in the repeating units of the polymer are connected to the carbon atoms through covalent bonding (C-H). The tertiary amide group, methylene and methine groups of the polymer do not have exchangeable protons with water (labile protons such as -OH, -NH are absent in the repeating units). Only a very minor amount of protons in the end group of the polymer (less than 0.1%) may exchange with water. Therefore, chemical exchange between water and the polymer is negligible. The model based on BPP theory is sufficient to obtain a picture of two types of water with significantly different mobility shown in Fig.3.

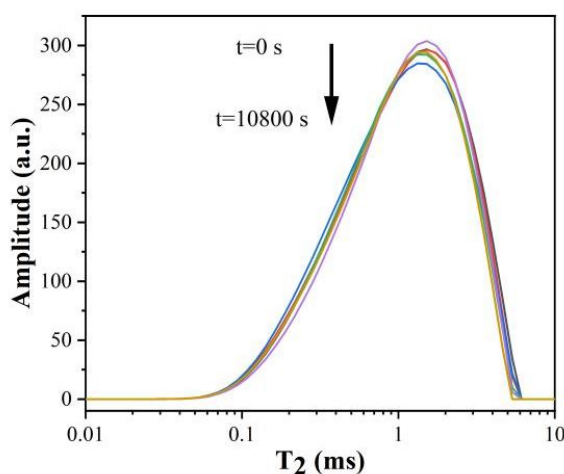

**Figure S4.** Time-dependent changes of bound water in their  $T_2$  relaxation distributions in the solution with PVCap  $M_n = 49.4$  kD during isothermal crystallization at  $-15^\circ\text{C}$ .

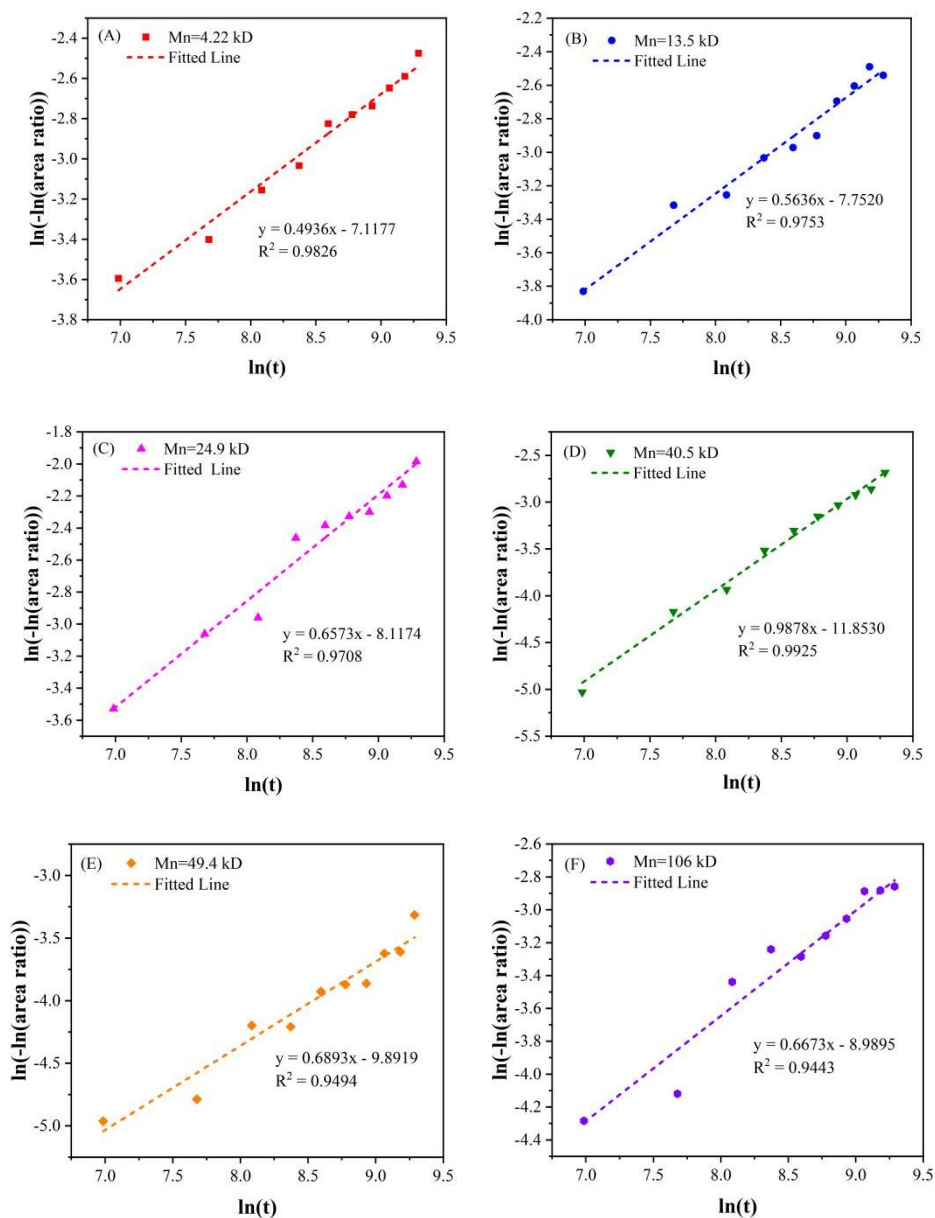

**Figure S5.** Isothermal changes of the bound water peak areas in the presence of PVCap with time at 258 K (or -15°C). The MW of each polymer A to F in each panel are also listed in Table 1.



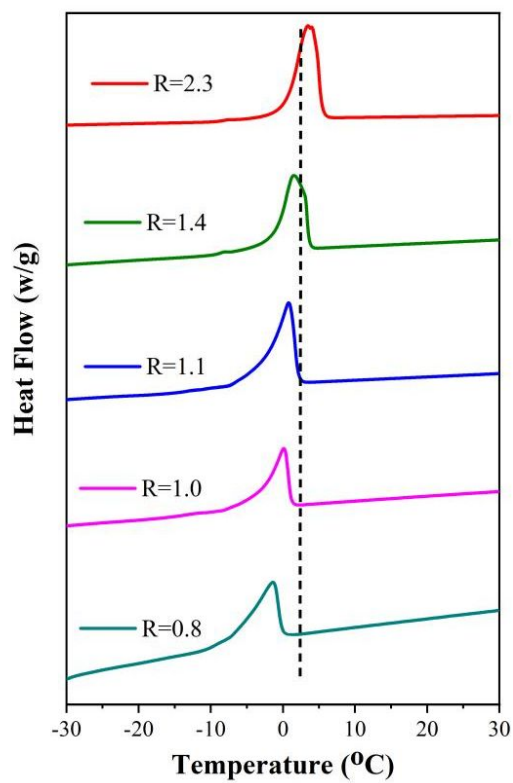

**Figure S6.** Typical calorimetric traces of water mixed with different amounts of PVCap polymers recorded from -30 to 30°C. The ratio R means the mass ratio of water to polymer. The heat flow unit is watt per gram.
